# Supplementary material for: Identification and Characterization of a Rhodopsin Kinase Gene in the Suckers of Octopus vulgaris: Looking around Using Arms?
Source: MDPI journal article supplement (doi:10.3390/biology10090936), 2021-09-19
Supplement: s1 [file s1]

ProtParam

A0A6P7TP13\_OCTVU (A0A6P7TP13)

G protein-coupled receptor kinase (EC 2.7.11.-)  
Octopus vulgaris (Common octopus)

The computation has been carried out on the complete sequence (691 amino acids).

Warning: All computation results shown below do **not** take into account any annotated post-translational modification.  
[References](#) and [documentation](#) are available.

Number of amino acids: 691

Molecular weight: 79613.46

Theoretical pI: 7.58

Amino acid composition: 

CSV format

|         |    |       |
|---------|----|-------|
| Ala (A) | 34 | 4.9%  |
| Arg (R) | 33 | 4.8%  |
| Asn (N) | 33 | 4.8%  |
| Asp (D) | 47 | 6.8%  |
| Cys (C) | 12 | 1.7%  |
| Gln (Q) | 24 | 3.5%  |
| Glu (E) | 54 | 7.8%  |
| Gly (G) | 41 | 5.9%  |
| His (H) | 22 | 3.2%  |
| Ile (I) | 42 | 6.1%  |
| Leu (L) | 66 | 9.6%  |
| Lys (K) | 69 | 10.0% |
| Met (M) | 25 | 3.6%  |
| Phe (F) | 31 | 4.5%  |
| Pro (P) | 21 | 3.0%  |
| Ser (S) | 37 | 5.4%  |
| Thr (T) | 34 | 4.9%  |
| Trp (W) | 6  | 0.9%  |
| Tyr (Y) | 24 | 3.5%  |
| Val (V) | 36 | 5.2%  |
| Pyl (O) | 0  | 0.0%  |
| Sec (U) | 0  | 0.0%  |
|         |    |       |
| (B)     | 0  | 0.0%  |
| (Z)     | 0  | 0.0%  |
| (X)     | 0  | 0.0%  |

Total number of negatively charged residues (Asp + Glu): 101  
Total number of positively charged residues (Arg + Lys): 102

Atomic composition:

|          |   |      |
|----------|---|------|
| Carbon   | C | 3540 |
| Hydrogen | H | 5598 |
| Nitrogen | N | 966  |
| Oxygen   | O | 1046 |
| Sulfur   | S | 37   |

Formula: C<sub>3540</sub>H<sub>5598</sub>N<sub>966</sub>O<sub>1046</sub>S<sub>37</sub>

Total number of atoms: 11187

Extinction coefficients:

Extinction coefficients are in units of M<sup>-1</sup> cm<sup>-1</sup>, at 280 nm measured in water.

Ext. coefficient 69510  
Abs 0.1% (=1 g/l) 0.873, assuming all pairs of Cys residues form cystines

Ext. coefficient 68760  
Abs 0.1% (=1 g/l) 0.864, assuming all Cys residues are reduced

Estimated half-life:

The N-terminal of the sequence considered is M (Met).

The estimated half-life is: 30 hours (mammalian reticulocytes, in vitro).  
>20 hours (yeast, in vivo).  
>10 hours (Escherichia coli, in vivo).

Instability index:

The instability index (II) is computed to be 42.42  
This classifies the protein as unstable.

Aliphatic index: 80.98

Grand average of hydropathicity (GRAVY): -0.527
