# Supplementary material for: Identification and Characterization of a Rhodopsin Kinase Gene in the Suckers of Octopus vulgaris: Looking around Using Arms?
Source: MDPI journal article supplement (doi:10.3390/biology10090936), 2021-09-19
Supplement: s1 [file s1]

Q

Search SWISS-MODEL Repository

A0A6P7TP13 (A0A6P7TP13\_OCTVU)*Octopus vulgaris (Common octopus)*

G protein-coupled receptor kinase

☆ UniProtKB

InterPro

Interactive Modelling

691 aa; Sequence (Fasta)

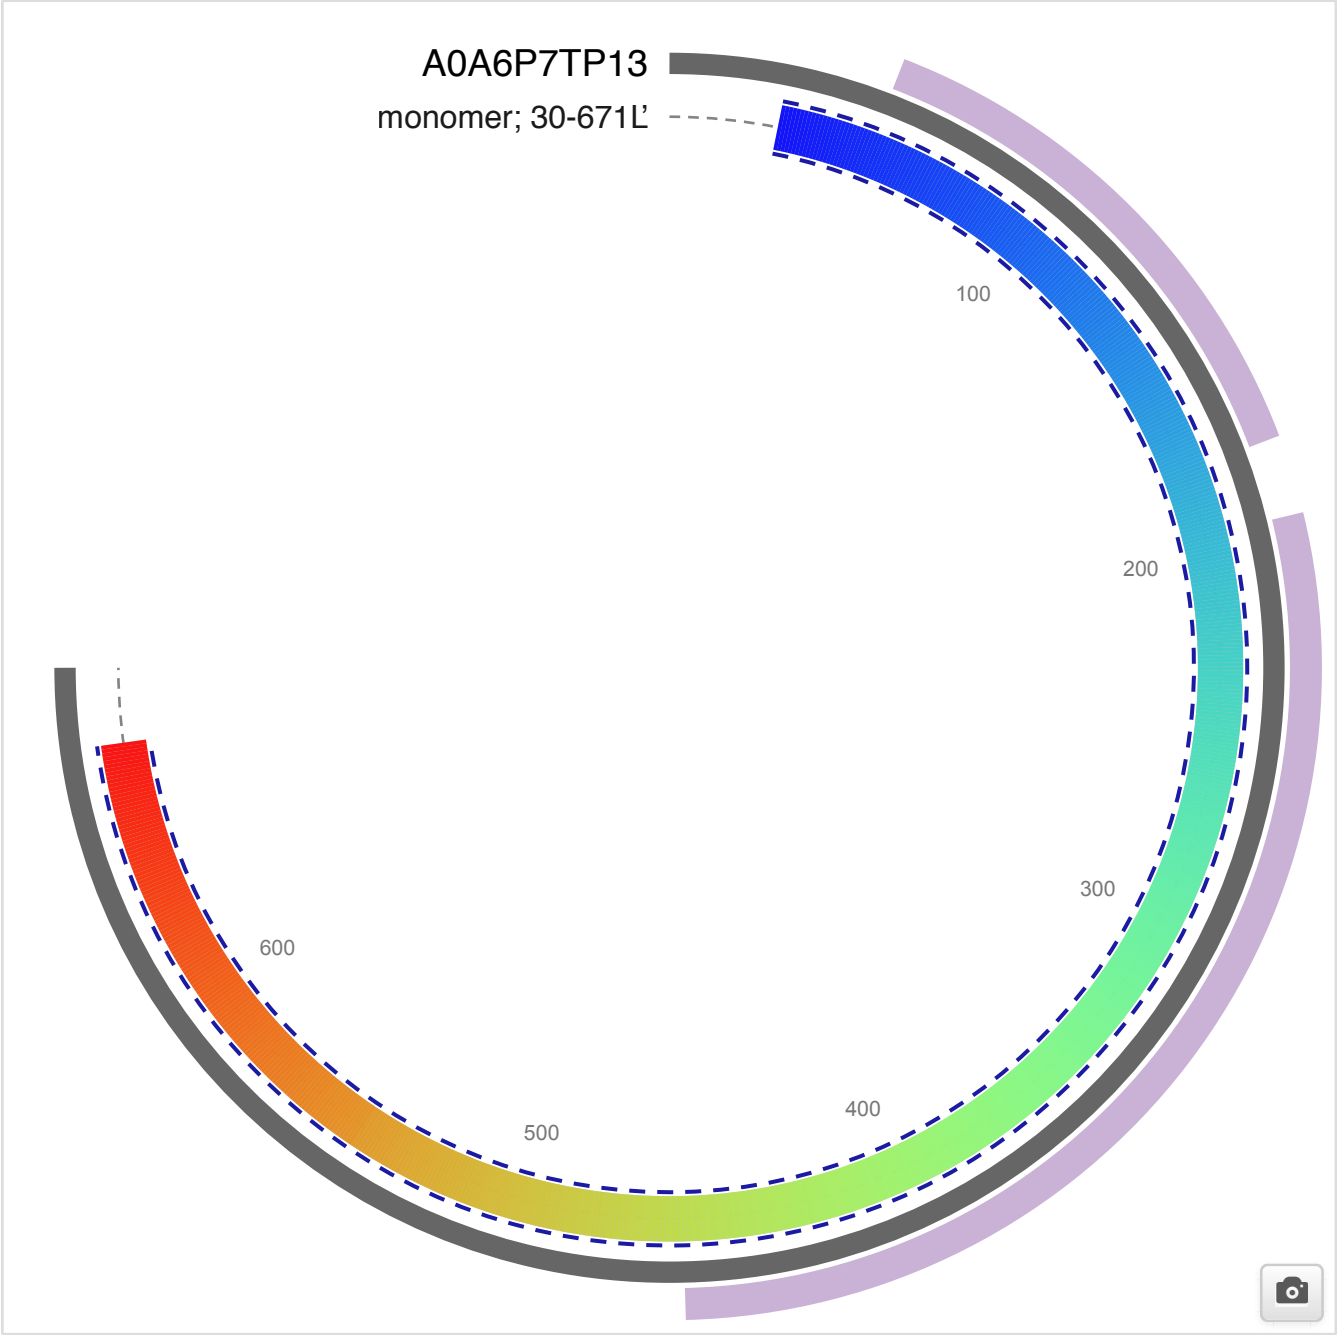

Homology Model

Template: **6c2y.1.A** "*Human GRK2 in complex with Gbetagamma subunits and CCG257142*" **P25098**

SMTL Version: 2021-03-03

Seq Identity: 66.32%

Seq Similarity: 0.50

1 x (4R,5R,6S)-4-[4-fluoro-3-([3-(methoxymethyl)-1,2,4-oxadiazol-5-yl]methyl)carbamoyl]phenyl]-N-(2H-indazol-5-yl)-6-methyl-2-oxohexahydropyrimidine-5-carboxamide

Coordinates:

Model Quality Estimate

QMEAN

Cβ

All Atom

solvation

torsion

-1.26

-1.30

-0.18

0.79

-1.28

Sequence Features

InterPro

+ Add

Cartoon

Sequence Alignments

Model based on 6c2y.1.A *Beta-adrenergic receptor kinase 1*

|          |                                                                                   |     |
|----------|-----------------------------------------------------------------------------------|-----|
| MODEL    | KKIVLPDPsirsvMHKHLlKNGiVtFEHiFDQRIgYllFkDfCnNGSDvPIAEiNFyEEiKKfQTMdTDedRIKQARDiY  | 109 |
| 6c2y.1.A | KKILLPEPSIRSVMQKYLEDRGevTFEKiFSQKLGYllFRDfClNHLEEARPLVEfyEEiKKyEKLETEEERVARsREiF  | 109 |
| MODEL    | DQFIMRELLAQCHEYTKTAINNVQDALTKARKTKQLGNHIFNkyKDEiRKKLNKEEFNKFLESdRYTRYLQWKNLELNiN  | 189 |
| 6c2y.1.A | DSYIMKELLACSHpFSKSATeHVQGHlGK---KQVPpDLfQPYIEEiCQNLRGdVfQKFIEsDKfTRfCQWKNVELNiH   | 185 |
| MODEL    | LTMNDFSVHRIiGRGGfGEVYgCRKADtGkMYAMKCLDKKRIKlKtGETLALNERiMlSLVStGECpFIVCMtYAFQTPe  | 269 |
| 6c2y.1.A | LTMNDFSVHRIiGRGGfGEVYgCRKADtGkMYAMKCLDKKRIKMkQGETLALNERiMlSLVStGDcPFIVCMsYAFHTPD  | 265 |
| MODEL    | KLCFiLDlMNGGDlHYHLSQHGvFSEQEvRFyAAEvilGLeHMHVrgVvYrDLKpANiLLDESGHVRISDLGLACDFsKK  | 349 |
| 6c2y.1.A | KLSFiLDlMNGGDlHYHLSQHGvFSEADMRfYAAEiIlGLeHMHNRfVvYrDLKpANiLLDEHGhVRISDLGLACDFsKK  | 345 |
| MODEL    | KPHASVGTHGYMAPEVLAKGVAYDSSADWFSFGCMLYKLLKGHSpFRQHKTKDKHEiDRMTMTMNVELPDsMSSEMKSLl  | 429 |
| 6c2y.1.A | KPHASVGTHGYMAPEVLQKGvAYDSSADWFSlGCMLfKLLRGHSpFRQHKTKDKHEiDRMTlTMaVELPDsFSPElRSLl  | 425 |
| MODEL    | EGLlKRdVEERlGCTgKGAEELKENpFFKDLdWNKVYQlHYTPPlIPPRGEVNAAADAFDiGSfDEDDTKGiRlSESdQQl | 509 |
| 6c2y.1.A | EGLlQRdVNRRlGClGRGAQEvKESpFFRSLdWQMVfLQKYPPPlIPPRGEVNAAADAFDiGSfDEEDTKGiKLLdSDQEL | 505 |

Homology models

| Oligo-state | QMEAN  | Template | Range       | Seq id (%) | Ligands |
|-------------|--------|----------|-------------|------------|---------|
| monomer     | -1.26  | 6c2y.1.A | <div></div> | 66.32      | 1×EJS;  |
|             | Assess |          |             |            |         |
