# Supplementary material for: Identification and Characterization of a Rhodopsin Kinase Gene in the Suckers of Octopus vulgaris: Looking around Using Arms?
Source: MDPI journal article supplement (doi:10.3390/biology10090936), 2021-09-19
Supplement: s1 [file s1]

| Organism (GI No.)                       | Gene Name                           | Full name                                                 | GenBank Accession No. |
|-----------------------------------------|-------------------------------------|-----------------------------------------------------------|-----------------------|
| <i>Ciona intestinalis</i>               | GRK4                                | similar to G protein-coupled receptor kinase 4            | XP_002122095          |
| <i>Apis mellifera</i>                   | G protein-coupled receptor kinase 1 | similar to G protein-coupled receptor kinase 1 isoform 1  | XP_396647             |
| <i>Bos taurus</i>                       | GRK1                                | rhodopsin kinase GRK1                                     | NM_174173             |
| <i>Capsaspora owczarzaki</i> ATCC 30864 | GRK4                                | G protein-coupled receptor kinase 4                       | EFW41776              |
| <i>Cyprinus carpio</i>                  | rhodopsin kinase GRK1a              | G protein-coupled receptor kinase 1a                      | BAB32497              |
| <i>Cyprinus carpio</i>                  | rhodopsin kinase GRK1b              | G protein-coupled receptor kinase 1b                      | BAE66638              |
| <i>Danio rerio</i>                      | rhodopsin kinase GRK1a              | rhodopsin kinase GRK1a                                    | NP_001029353          |
| <i>Danio rerio</i>                      | rhodopsin kinase GRK1b              | rhodopsin kinase GRK1b                                    | NP_001017711          |
| <i>Didelphis virginiana</i>             | ARBK1_DIDVI                         | Beta-adrenergic receptor kinase 1                         | O97627                |
| <i>Doryteuthis pealeii</i>              | rhodopsin kinase                    | rhodopsin kinase                                          | AAF08967              |
| <i>Drosophila melanogaster</i>          | GRK1                                | G protein-coupled receptor kinase 1, isoform A            | NP_001036438          |
| <i>Enteroctopus dofleini</i>            | rhodopsin kinase                    | rhodopsin kinase                                          | BAA75507              |
| <i>Equus caballus</i>                   | rhodopsin kinase                    | rhodopsin kinase                                          | XP_001504141          |
| <i>Euprymna scolopes</i>                | light organ rhodopsin kinase        | light organ rhodopsin kinase mRNA                         | ACB05677              |
| <i>Euprymna scolopes</i>                | eye rhodopsin kinase                | eye rhodopsin kinase mRNA                                 | ACB05676              |
| <i>Falco cherrug</i>                    | rhodopsin kinase                    | rhodopsin kinase                                          | XP_005443720          |
| <i>Gallus gallus</i>                    | rhodopsin kinase GRK1               | rhodopsin kinase GRK1                                     | NP_990026             |
| <i>Homo sapiens</i>                     | GRK1_HUMAN                          | G protein-coupled receptor kinase 1                       | Q15835                |
| <i>Homo sapiens</i>                     | ARBK1_HUMAN                         | Beta-adrenergic receptor kinase 1                         | P25098                |
| <i>Loligo forbesii</i>                  | rhodopsin kinase                    | rhodopsin kinase                                          | AAR19398              |
| <i>Mus musculus</i>                     | GRK1                                | rhodopsin kinase GRK1                                     | NP_036011             |
| <i>Octopus bimaculoides</i>             | G protein-coupled receptor kinase 1 | G protein-coupled receptor kinase 1-like                  | XP_014774259          |
| <i>Octopus vulgaris</i>                 | G protein-coupled receptor kinase 1 | G protein-coupled receptor kinase 1-like                  | XP_029651650          |
| <i>Oryzias latipes</i>                  | GRK1a                               | OIGRK-R [Oryzias latipes]                                 | BAA25671              |
| <i>Oryzias latipes</i>                  | GRK1b                               | OIGRK-R (Rhodopsin kinase GRK1 [Oryzias latipes])         | NP_001188419          |
| <i>Rattus norvegicus</i>                | GRK1                                | rhodopsin kinase GRK1 [Rattus norvegicus]                 | NP_112358             |
| <i>Tetraodon nigroviridis</i>           | GRK1a                               | G protein-coupled receptor kinase 1-like                  | 47230559              |
| <i>Tetraodon nigroviridis</i>           | GRK1b                               | G protein-coupled receptor kinase 1-like                  | 47222525              |
| <i>Tribolium castaneum</i>              | G protein-coupled receptor kinase 1 | G protein-coupled receptor kinase 1 [Tribolium castaneum] | XP_966480             |
| <i>Xenopus laevis</i>                   | GRK1                                | LOC733223 protein, partial [Xenopus laevis]               | AAH94133              |
